# Supplementary material
Source: Springer Nature journal article supplement (https://www.springermedizin.de/resource/supplementary/13063_2009_466_MOESM3_ESM.pdf/9618274)
Supplement: MOESM3 [file 9618274]

$$\text{obs}_i \sim \text{Poisson}(\pi_i)$$

$$\log(\pi_i) = \text{offs}_i + \beta_{0i} + \beta_1 \text{perc\_aff}_i$$

offset =  $\ln(\text{expected no.})$

exposure variable

$$\beta_0 + \sum_{j \in \text{neigh}l(i)} w_{ij}^{(3)} \mu_{0j}^{(3)} + \mu_{0, \text{area}(i)}^{(2)}$$

fixed part of intercept

random intercepts for adjacent  
neighbours weighted by  
summed memberships

random intercept for each  
separate area (County District)

NB constrained to have equal  
variance
